# Supplementary material for: Induction of Foxp3 and activation of Tregs by HSP gp96 for treatment of autoimmune diseases
Source: PubMed Central journal article supplement — iScience. 2021 Nov 17;24(12):103445. doi: 10.1016/j.isci.2021.103445 (PMC8633978; doi:10.1016/j.isci.2021.103445), 2021-11-17
Supplement: mmc1.pdf [file mmc1.pdf]

**iScience, Volume 24**

**Supplemental information**

**Induction of Foxp3 and activation of Tregs by HSP**

**gp96 for treatment of autoimmune diseases**

**Yuxiu Xu, Erlong Liu, Xialin Xie, Jiuru Wang, Huaguo Zheng, Ying Ju, Lizhao Chen, Changfei Li, Xuyu Zhou, Zihai Li, Xin Li, and Songdong Meng**

1

# Supplementary Materials

2

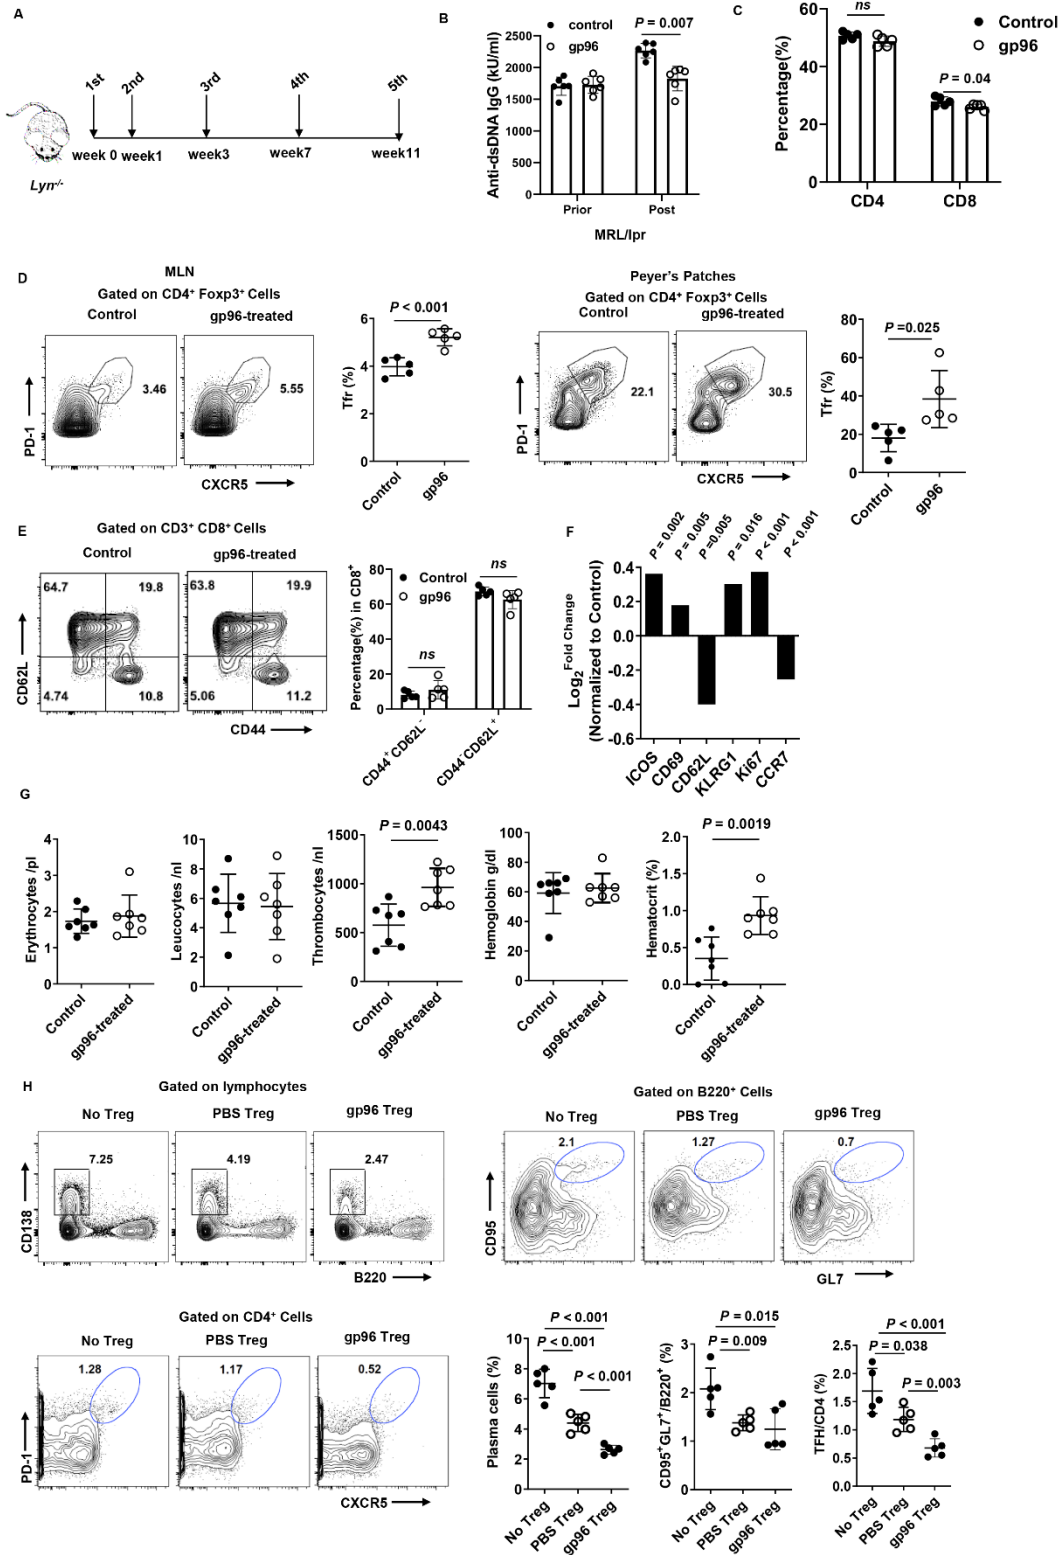

3

4 Supplementary Figure S1. Treatment of SLE by gp96 is dependent on Treg,

5 Related to Figure 1. Mice were immunized as in (A). (B) Serum anti-  
6 dsDNA antibodies were determined by ELISA in MRL/lpr mice one week  
7 after the last immunization. (C) FACS analysis of CD4<sup>+</sup> and CD8<sup>+</sup>  
8 percentage in spleen of *Lyn*<sup>-/-</sup> mice treated with gp96 or saline (control). (D)  
9 Analysis of CXCR5<sup>+</sup>PD-1<sup>+</sup>Foxp3<sup>+</sup> Tfr cells in the MLN and Peyer's  
10 Patches of mice immunized at 16 weeks of age. (E) Analysis of CD8<sup>+</sup>  
11 activation in spleen of *Lyn*<sup>-/-</sup> mice treated with gp96 or saline (control). (F)  
12 Log<sub>2</sub> fold change of ICOS, CD69, CD62L, KLRG1, Ki67 and CCR7 on  
13 Treg from gp96- or saline-treated *Lyn*<sup>-/-</sup> mice. (G) Analysis of peripheral  
14 blood cells in *Lyn*<sup>-/-</sup> mice treated with gp96 or saline (control). (H) FACS  
15 analysis of plasma cells, germinal center B cells and follicular T helper  
16 cells in the spleen of *Lyn*<sup>-/-</sup> mice transferred with Tregs treated as in Fig.  
17 1K. The Student's t test was used for statistical analysis. *P* values < 0.05  
18 were considered statistically significant.

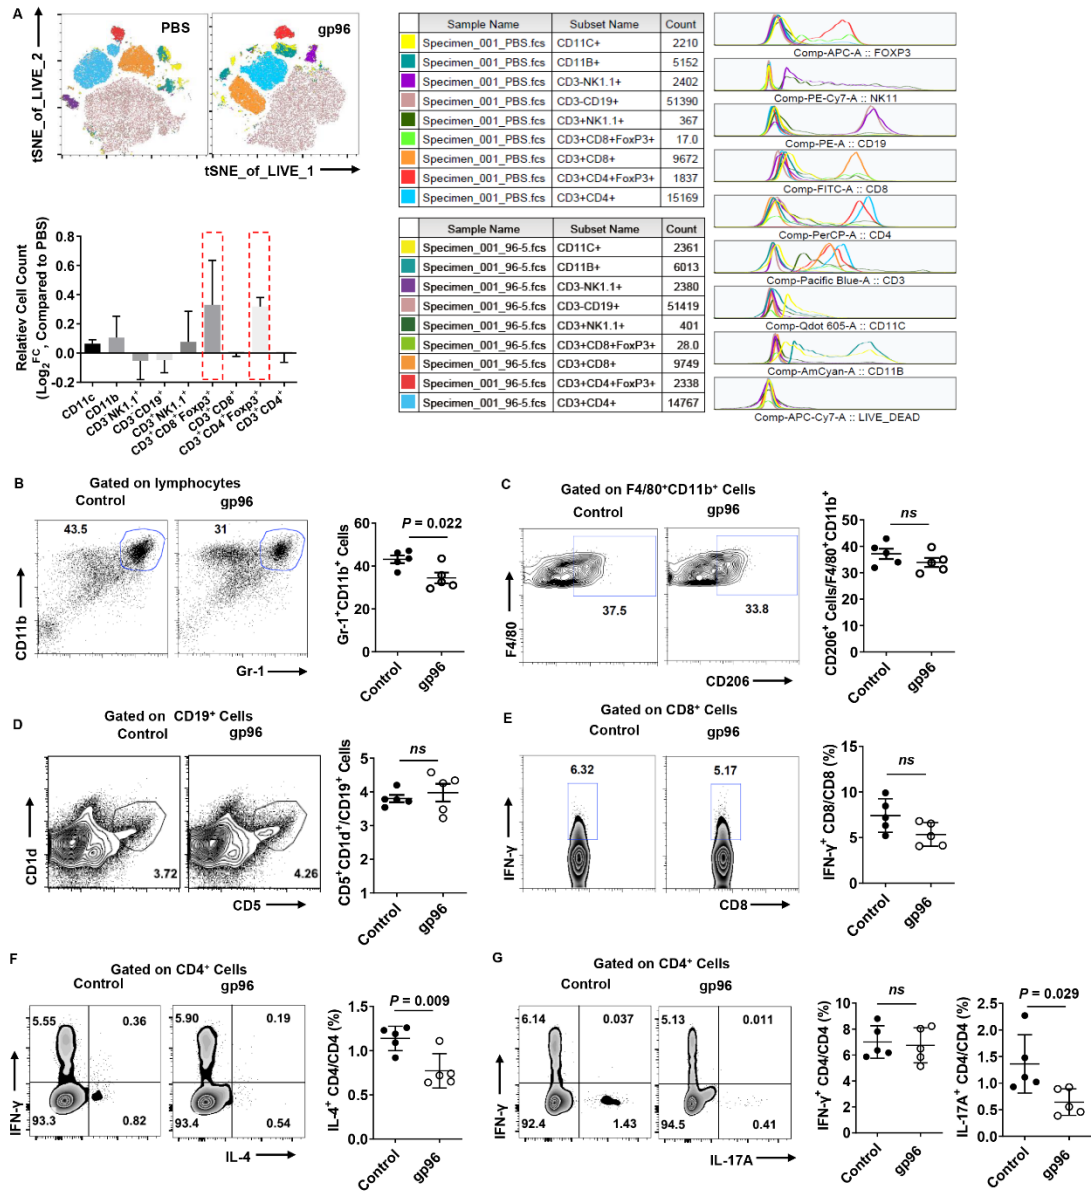

19

20 Supplementary Figure S2. Gp96 specifically upregulated Foxp3<sup>+</sup> T cells,

21 Related to Figure 3. (A) T-distributed stochastic neighbor embedding

22 (tSNE) plots showed distribution of lymphocyte clusters by flow cytometry.

23 (B-D) Flow cytometry analysis of MDSC (B), M2-Macrophage (C) and

24 regulatory B cells (D) in spleen from gp96- or saline (control)-immunized

25 mice. (E-G) Flow cytometry analysis of IFN- $\gamma$ -secreting CD8<sup>+</sup> T cells

26 (CTL) (E), IL-4 secreting CD4<sup>+</sup> T cells (Th2) (F), IFN- $\gamma$ -secreting CD4<sup>+</sup> T

27 cells (Th1) and IL-17A secreting CD4<sup>+</sup> T cells (Th17) (G) in spleen from  
28 gp96-or saline (control)-immunized mice. (n=5/group). The Student's t test  
29 was used for statistical analysis. *P* values < 0.05 were considered  
30 statistically significant. ns=not significant.

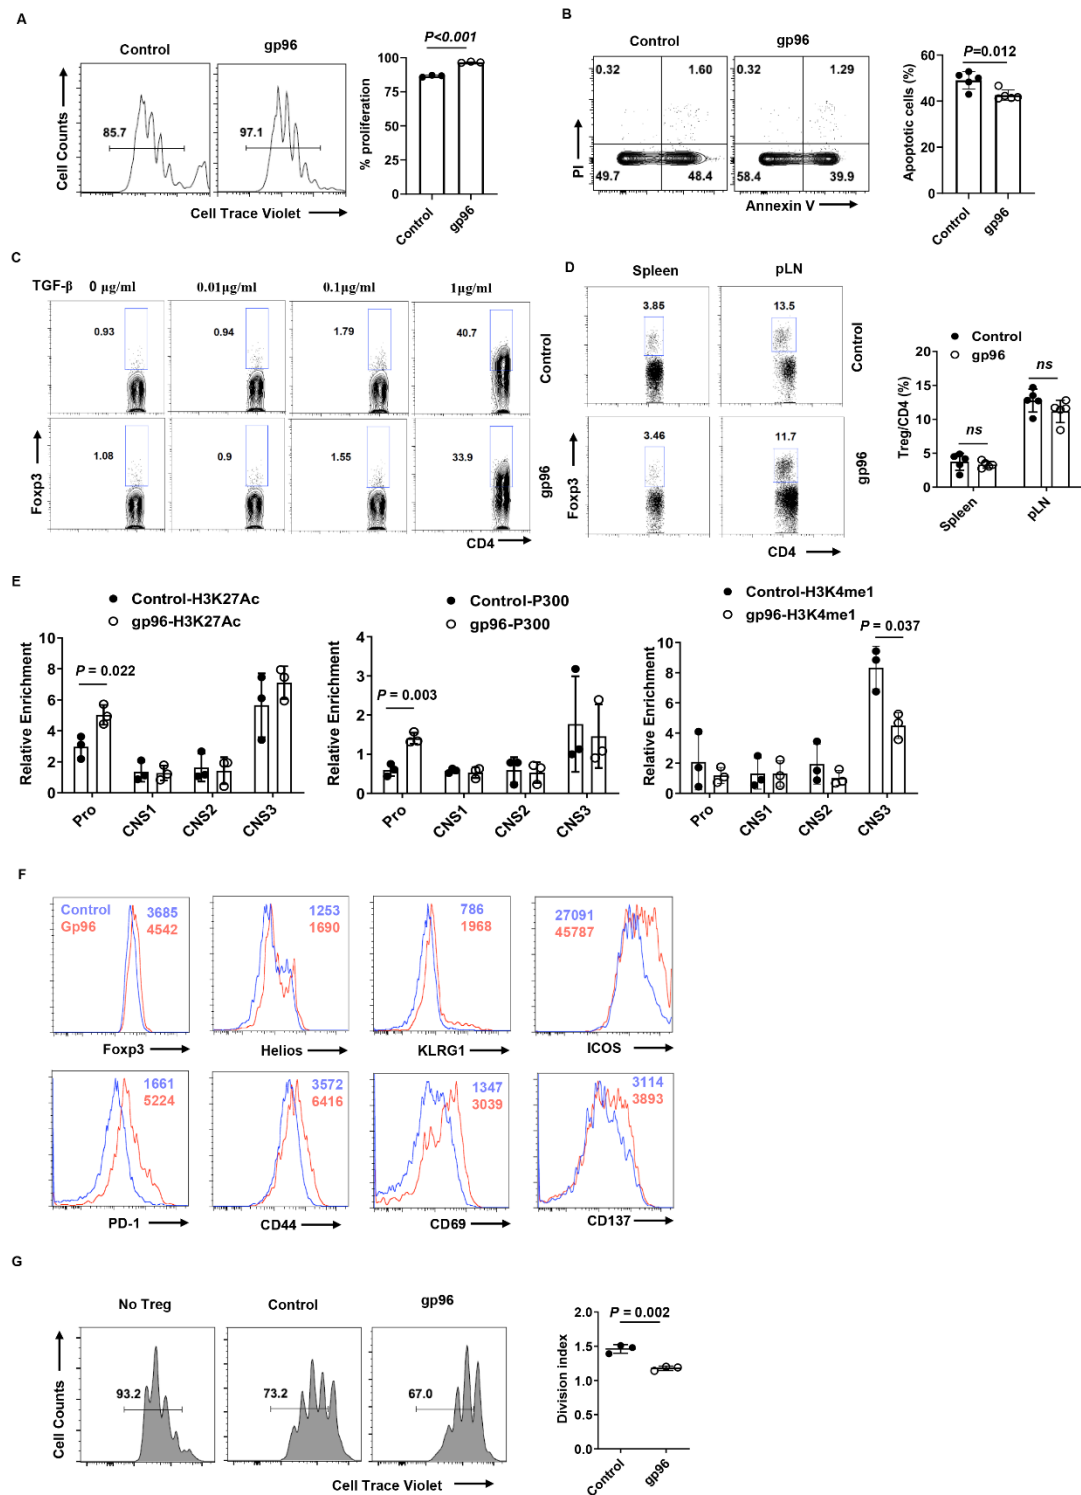

31

32 Supplementary Figure S3. Gp96 promotes Treg proliferation and  
 33 suppression function, Related to Figure 3. (A) Treg cell division cycle was  
 34 measured using FACS. (B) FACS analysis of Treg apoptosis by Annexin  
 35 V Apoptosis Detection Kit. Annexin V<sup>+</sup> cells were counted as apoptotic

36 cells. (C) Naïve CD4<sup>+</sup> T cells were cultured for 3 days with different  
37 amounts of TGF-β (1, 0.1, 0.01 or 0 ng/ml) and IL-2 (100 U/ml) in the  
38 presence of saline or gp96 (100 μg/ml). Cells were then stained for Foxp3.  
39 (D) *Rag2*<sup>-/-</sup> mice were intravenously transferred with sorted naïve CD4<sup>+</sup> T  
40 cells from C57BL/6 mice, and then immunized with gp96 or saline for  
41 three times. Treg cells from spleen and lymph nodes were analyzed 4 weeks  
42 after the adoptive transfer. (E) ChIP analysis of H3K27ac, P300 and H3K4  
43 monomethylation (H3K4me1) at the Foxp3 locus of Tregs. Treg cells from  
44 spleen were treated with 100 μg /ml gp96 or saline (control) for 4 h. Cell  
45 lysates were immunoprecipitated with anti-H3K27ac, anti-P300 or anti-  
46 H3K4me1 antibodies, followed by real-time PCR analysis. (F) FACS  
47 analysis of markers on Treg. Sorted Treg were cultured for 3 days with  
48 Dynabeads<sup>TM</sup> mouse T-activator CD3/CD28 and IL-2 (2000U/ml) in the  
49 presence of saline (control) or gp96 (100 μg/ml). Red line, gp96. Blue line,  
50 control. (G) A total of 5×10<sup>4</sup> cell trace violet-labeled CD4<sup>+</sup>CD25<sup>-</sup> Teff cells  
51 were cultured with Tregs at a ratio of 4:1 for 3 days. Teff cell division cycle  
52 was measured using FACS (left). Division index was calculated (right).  
53 The Student's t test was used for statistical analysis. *P* values < 0.05 were  
54 considered statistically significant. ns=not significant.

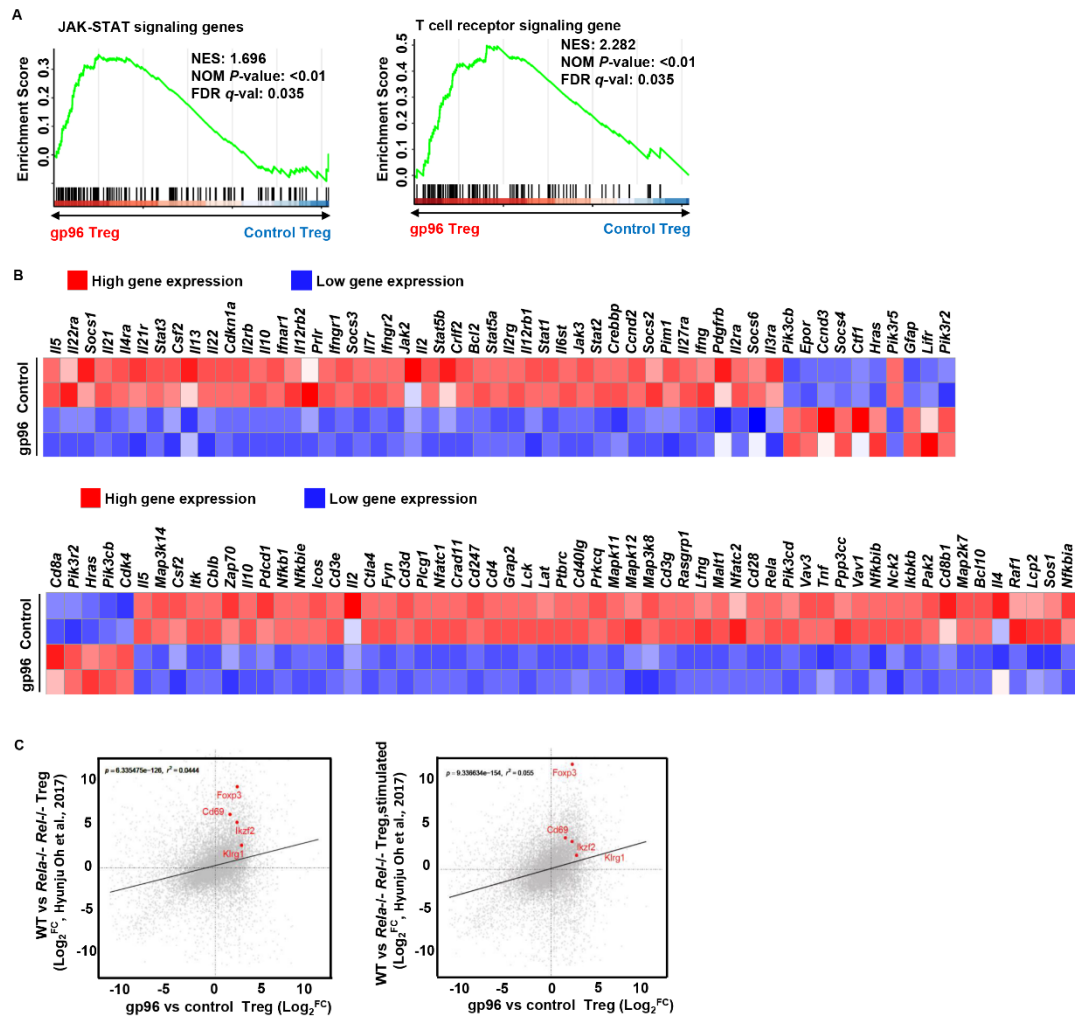

55

56 Supplementary Figure S4. Treg signature gene expression changes by gp96

57 are related to p65 and c-Rel, Related to Figure 5. (A) Gene set enrichment

58 analysis (GSEA) of JAK-STAT signaling and T cell receptor signaling gene

59 set in gp96-treated Foxp3-Cre Treg cells relative to expression in control

60 Treg cells. (B) Heatmap of JAK-STAT signaling and T cell receptor

61 signaling pathways (Log<sub>2</sub> fold change) that are differentially expressed. (C)

62 Log<sub>2</sub> fold changes of gp96-treated Treg versus control Treg and

63 unstimulated *Rela*<sup>-/-</sup> *Rel*<sup>-/-</sup> (DKO) versus unstimulated WT Treg (Left) and

64 Log<sub>2</sub> fold changes of gp96-treated Treg versus control Treg and stimulated

65 *Rela*<sup>-/-</sup> *Rel*<sup>-/-</sup> (DKO) versus stimulated WT Treg (Right) were plotted.



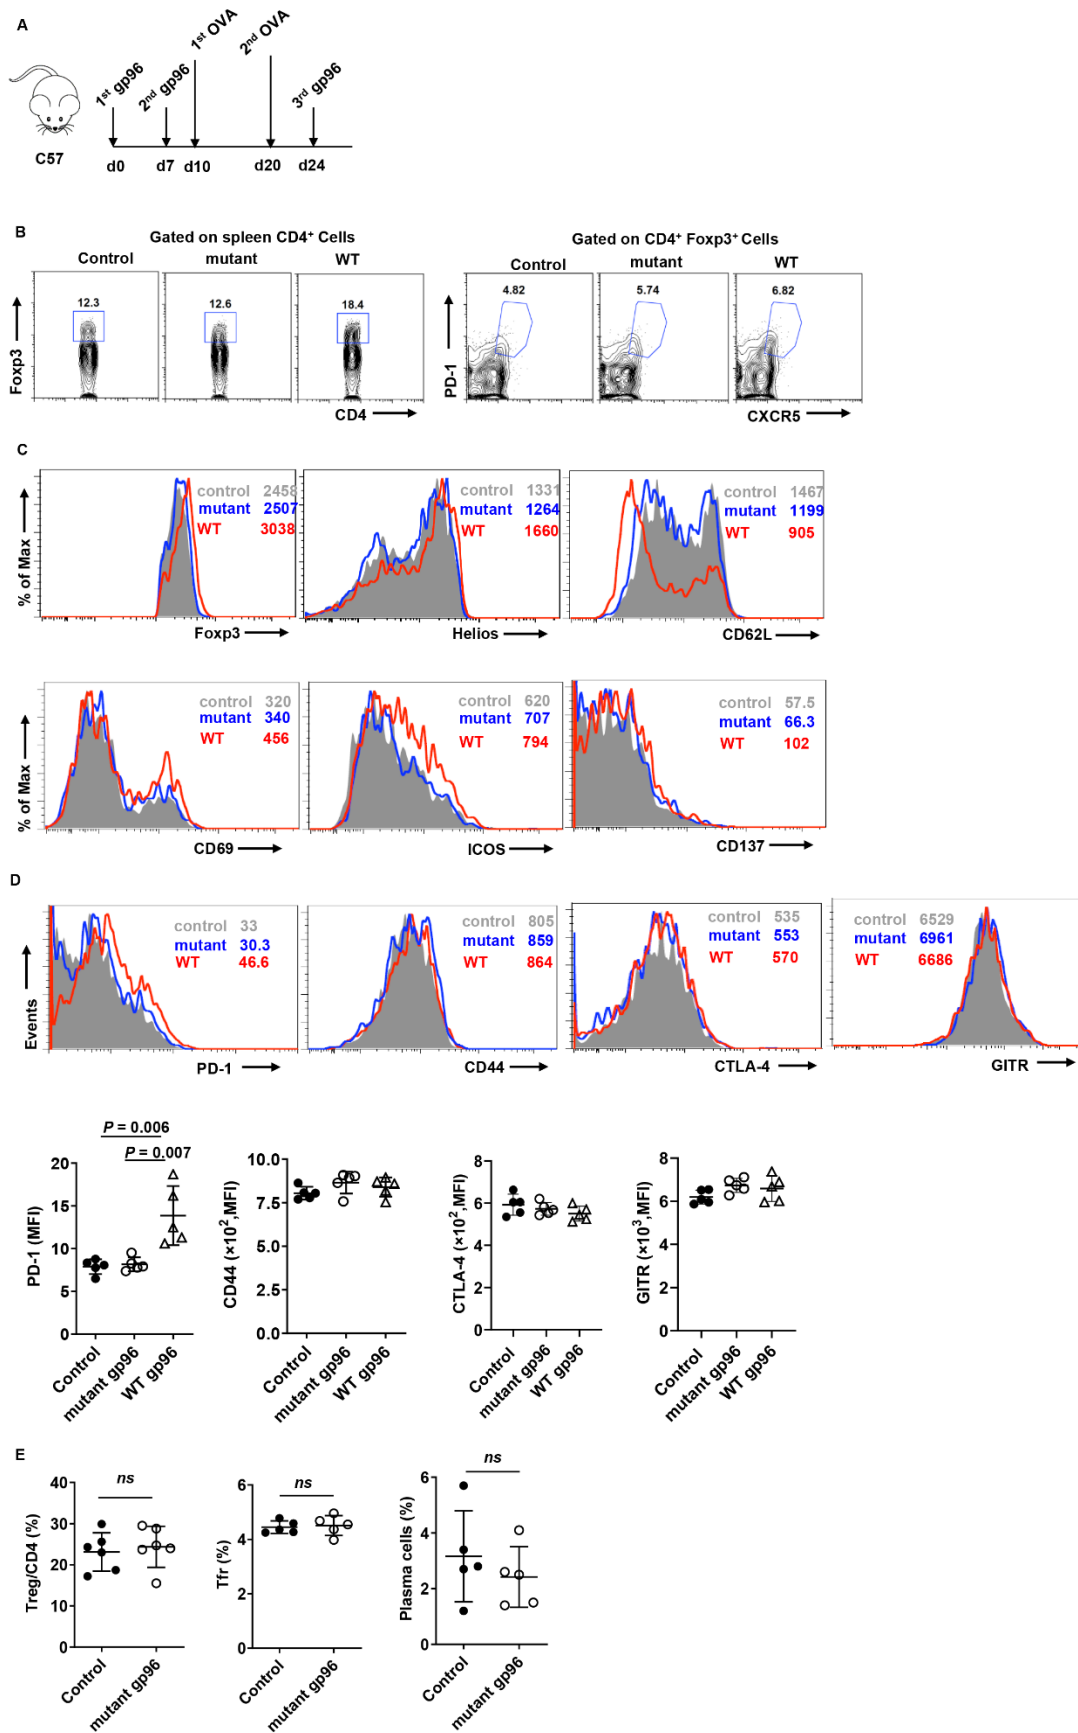

66

67 Supplementary Figure S5. Activation of Treg by gp96 requires TLRs

68 binding domain, Related to Figure 6. (A) C57BL/6 mice were immunized  
 69 with 200  $\mu$ g wide-type gp96 (WT) or mutant gp96 or saline as control and  
 70 treated with NP-OVA (n=5/group). (B) FACS analysis of Treg cells and Tfr  
 71 cells in spleen. (C) Mean fluorescence intensity (MFI) of the indicated  
 72 markers as in Fig.6E. (D) FACS analysis and mean fluorescence intensity  
 73 (MFI) of PD-1, CD44, CTLA-4, GITR. (E) FACS analysis of CD4<sup>+</sup>Foxp3<sup>+</sup>  
 74 Treg, Tfr and plasma cells in spleen of *Lyn*<sup>-/-</sup> mice. The Student's t test was  
 75 used for statistical analysis. *P* values < 0.05 were considered statistically  
 76 significant. ns=not significant.

77

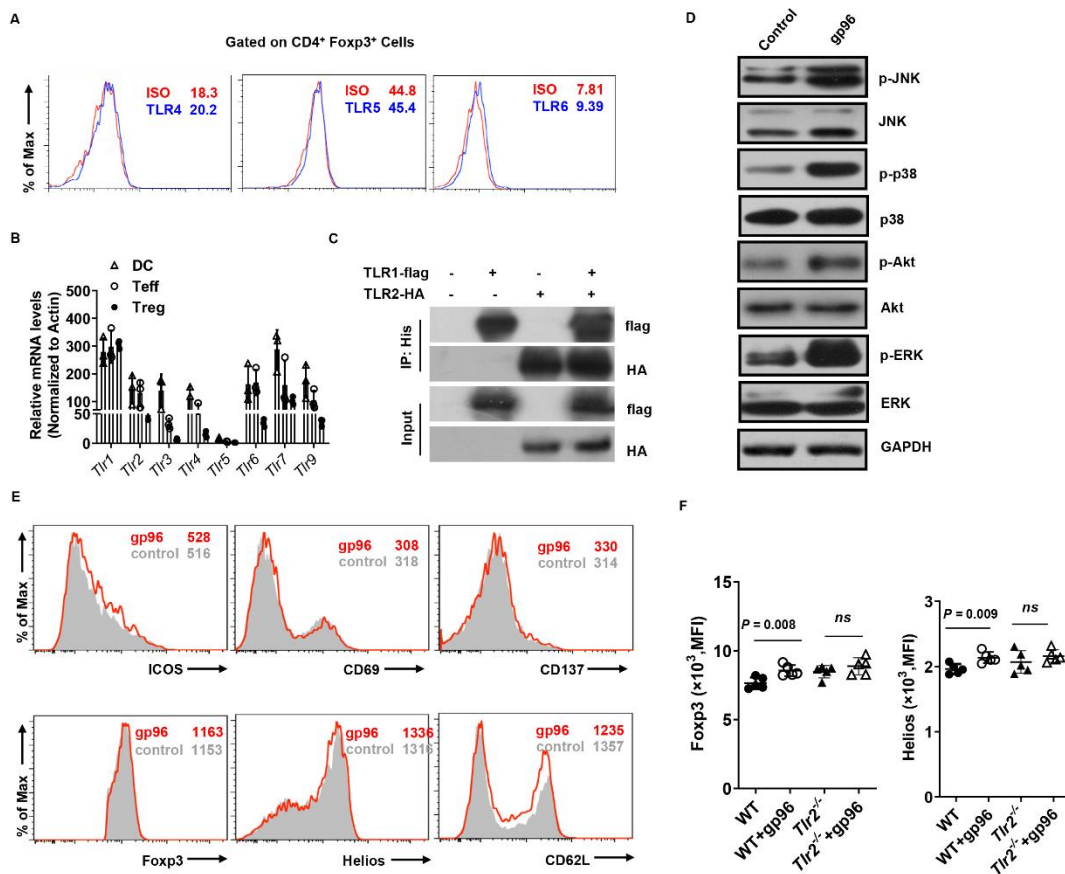

78

79 Supplementary Figure S6. Gp96 activates TLR2 down-stream pathway,

80 Related to Figure 6. (A) FACS analysis of surface TLR4/5/6 expression in  
81 CD4<sup>+</sup>Foxp3<sup>+</sup> Tregs from C57BL/6 mice. (B) Real-time PCR analysis of  
82 different TLRs expression in CD11c<sup>+</sup> DC cells, CD4<sup>+</sup>Foxp3<sup>-</sup> Teff cells and  
83 CD4<sup>+</sup>Foxp3<sup>+</sup> Tregs. (C) 293T cells were co-transfected with an empty  
84 vector, TLR1-FLAG, TLR2-HA or both TLR1-FLAG and TLR2-HA for  
85 48 h. Cells were cultured with 100 µg/ml His-gp96 for additional 4 h before  
86 subjected to immunoprecipitation with anti-His antibody and western  
87 blotting. (D) Western blot of JNK, p38, Akt and ERK phosphorylation in  
88 Treg cells treated with 100 µg/ml of gp96 or saline (control). (E) Flow  
89 cytometry analysis of ICOS, CD69, CD137, Foxp3, Helios and CD62L  
90 expression on CD4<sup>+</sup>Foxp3<sup>+</sup> Tregs in the spleen from *Tlr2*<sup>-/-</sup> mice  
91 immunized with 200 µg gp96 or saline (control) (n=5/group). (F) Flow  
92 cytometry analysis of Foxp3 and Helios expression on CD4<sup>+</sup>Foxp3<sup>+</sup> Tregs  
93 from CD45.1<sup>+</sup> cells and CD45.2<sup>+</sup> cells as in Fig.6M.

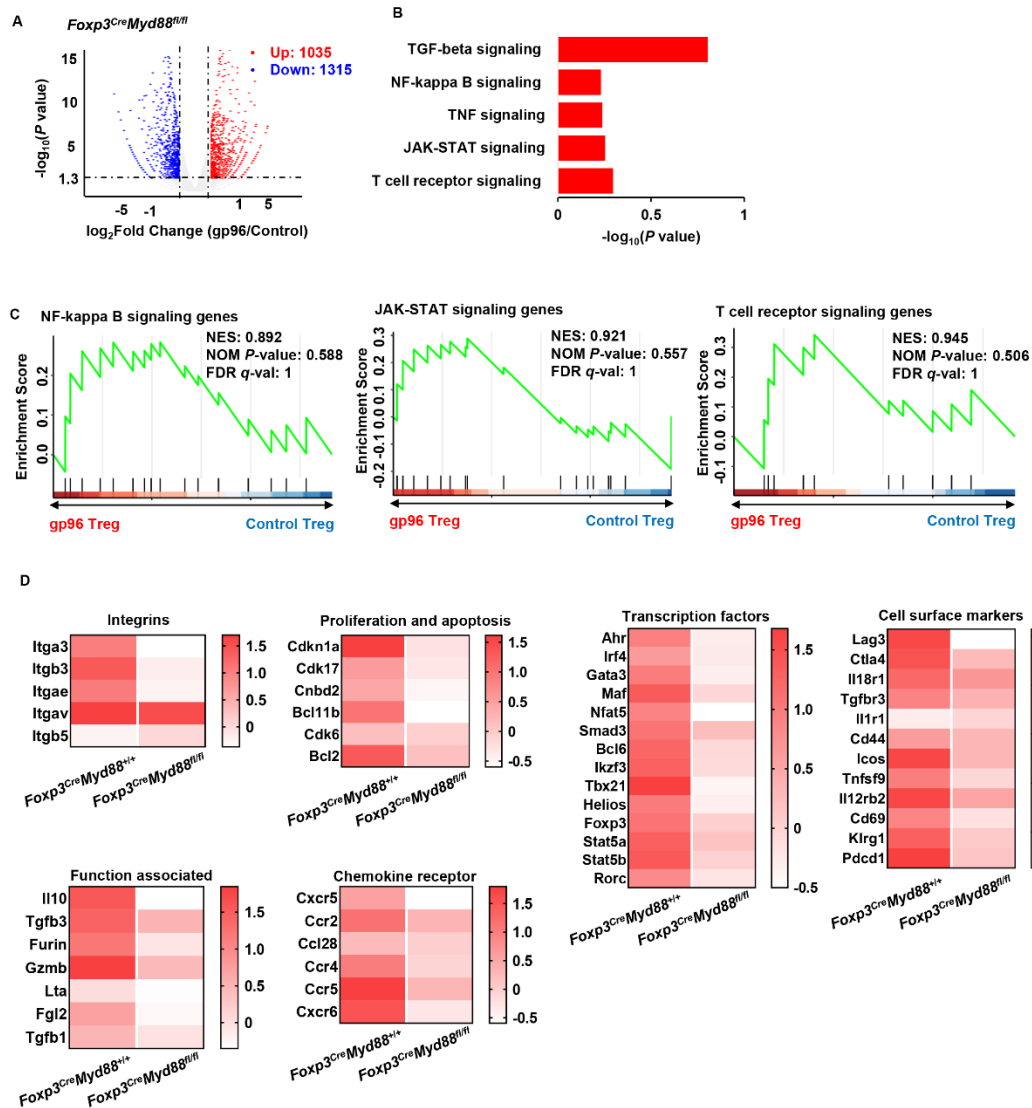

94

95 Supplementary Figure S7. MyD88 signaling is essential for gp96-induced

96 Treg signature gene expression changes, Related to Figure 7. (A) Global

97 gene expression in Treg cells from gp96-immunized *Foxp3<sup>Cre</sup>Myd88<sup>fl/fl</sup>*

98 mice vs. from saline-treated *Foxp3<sup>Cre</sup>Myd88<sup>fl/fl</sup>* numbers in plots indicate

99 genes up-regulated (red) or down-regulated (blue) by twofold or more ( $P$

100  $< 0.05$ ). (B) Gene Ontology (GO) terms of the differentially expressed

101 genes. (C) Gene set enrichment analysis (GSEA) of NF- $\kappa$ B signaling, JAK-

102 STAT signaling and T cell receptor signaling gene set. (D) Heat map of

103 Treg signature genes in *Foxp3<sup>Cre</sup>Myd88<sup>+/+</sup>* and *Foxp3<sup>Cre</sup>Myd88<sup>fl/fl</sup>* mice.

104 Relative gene expression levels were shown as Log<sub>2</sub> fold changes in gp96-

105 immunized mice relative to control mice.

106

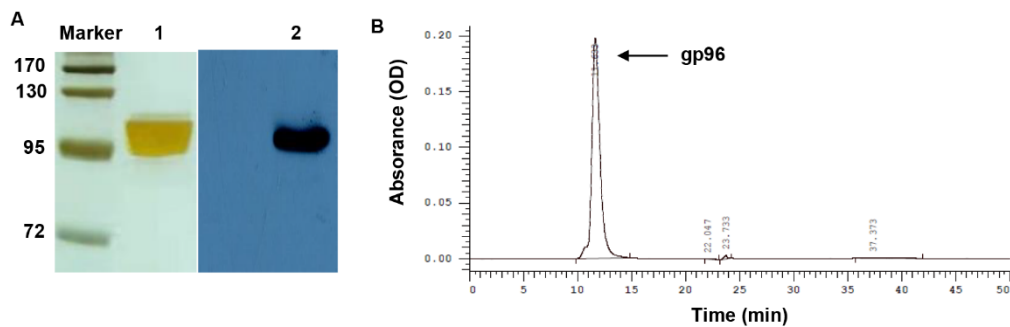

107

108 Supplementary Figure S8. Purification of recombinant gp96, Related to the

109 STAR Methods. (A) The purified recombinant gp96 preparations were

110 subjected to SDS-PAGE and silver nitrate staining (lane 1) or

111 immunoblotted with anti-gp96 Ab (lane 2). (B) HPLC analysis of

112 recombinant gp96. The purity of recombinant protein was determined by

113 HPLC and showed a specific peak at about 12 minutes.

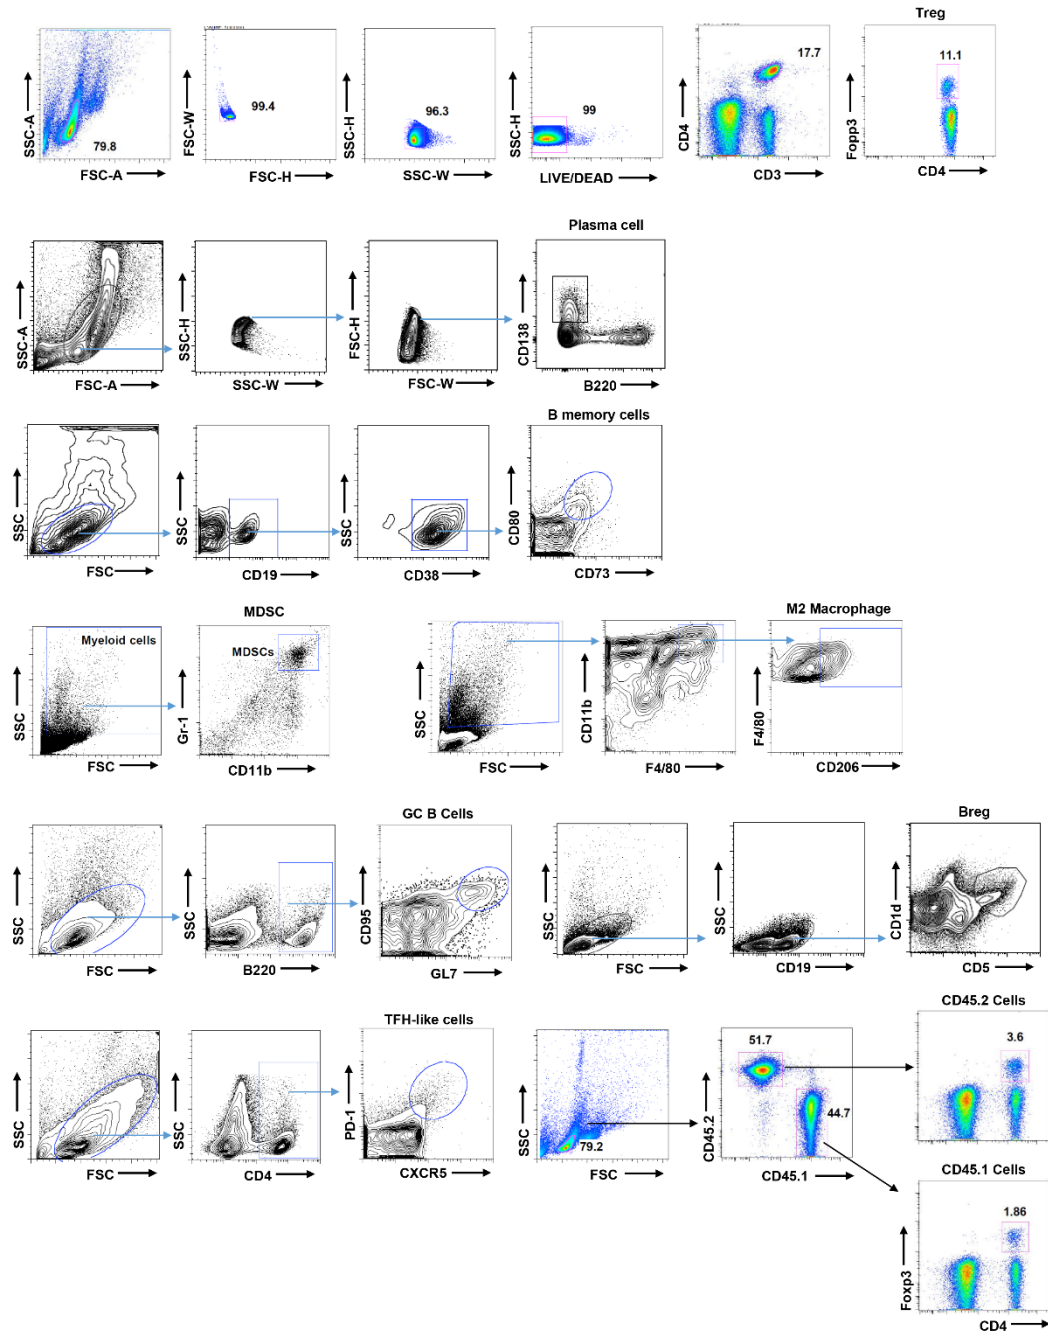

114

115 Supplementary Figure S9. Flow cytometry gating strategy for immune cell

116 identification used in this article, Related to Figure 1.

117

118 Table S1. List of primers used in reverse transcription quantitative PCR  
 119 (RT-qPCR) (Related to STAR Methods).

| <b>Primers</b>            | <b>Sequence (5'-3')</b>   |
|---------------------------|---------------------------|
| <i>Foxp3</i> -Forward (F) | GGCCCTTCTCCAGGACAGA       |
| <i>Foxp3</i> -Reverse (R) | GCTGATCATGGCTGGGTTGT      |
| <i>Tlr1</i> -F            | GCATGATTCTGCCTGGGTGAAG    |
| <i>Tlr1</i> -R            | GGAATGGGTGCCAGCAAGATG     |
| <i>Tlr2</i> -F            | AAGAGGAAGCCCAAGAAAGC      |
| <i>Tlr2</i> -R            | GAAGTCAGGAACTGGGTGGAG     |
| <i>Tlr3</i> -F            | ACCCTCTGTGCAGAAGATTCA     |
| <i>Tlr3</i> -R            | GCTGAATTCCGAGATCCAAG      |
| <i>Tlr4</i> -F            | AAACTTGCCTTCAAAACCTGGC    |
| <i>Tlr4</i> -R            | ACCTGAACTCATCAATGGTCACATC |
| <i>Tlr5</i> -F            | CGAGTGAGGTCAGTCCTGGA      |
| <i>Tlr5</i> -R            | GTCTGGAGAGGCTCATGCTAAG    |
| <i>Tlr6</i> -F            | CCTGGTATGTGAGGATGCTGTGTC  |
| <i>Tlr6</i> -R            | GAGACAGCACAAAGATGGCCTTG   |
| <i>Tlr7</i> -F            | CTGTCTCAGAGGACTCCATCTATAG |
| <i>Tlr7</i> -R            | GTCAGAGATAGGCCAGGATCATC   |
| <i>Tlr9</i> -F            | CTGGTACTGTTTTTCATCTGTGCC  |
| <i>Tlr9</i> -R            | CAGCTCGTTATACACCCAGTC     |
| <i>Actb</i> -F            | CGCCACCAGTTCGCCATGGA      |

|                                                     |                            |
|-----------------------------------------------------|----------------------------|
| <i>Actb</i> -R                                      | TACAGCCCGGGGAGCATCGT       |
| <b>For detection of methylation and acetylation</b> | <b>Sequence (5'-3')</b>    |
| <i>Foxp3</i> promoter-F                             | TAATGTGGCAGTTTCCCACAAGCC   |
| <i>Foxp3</i> promoter-R                             | AATACCTCTCTGCCACTTTCGCCA   |
| <i>Foxp3</i> CNS1-F                                 | AGACTGTCTGGAACAACCTAGCCT   |
| <i>Foxp3</i> CNS1-R                                 | TGGAGGTACAGAGAGGTTAAGAGCCT |
| <i>Foxp3</i> CNS2-F                                 | ATCTGGCCAAGTTCAGGTTGTGAC   |
| <i>Foxp3</i> CNS2-R                                 | GGGCGTTCCTGTTTGACTGTTTCT   |
| <i>Foxp3</i> CNS3-F                                 | TCTCCAGGCTTCAGAGATTCAAGG   |
| <i>Foxp3</i> CNS3-R                                 | ACAGTGGGATGAGGATACATGGCT   |
| <i>Hsp90ab1</i> -F                                  | TTACCTTGACGGGAAAGCCGAGTA   |
| <i>Hsp90ab1</i> -R                                  | TTCGGGAGCTCTCTTGAGTCACC    |
| <i>Rpl30</i> -F                                     | TCGGCTTCACTCACCGTCTTCTTT   |
| <i>Rpl30</i> -R                                     | TGTCCTCTGTGTATGCTAGGTTGG   |
| <i>Hspa2</i> -F                                     | TCGTGGAGAGTTGTGAGAAGCGA    |
| <i>Hspa2</i> -R                                     | AACGTTAGGACGAAAGCGTCAGGA   |
| <i>Gm5069</i> -F                                    | TAAGCAATTGGTGGTGCAGGATGC   |
| <i>Gm5069</i> -R                                    | AAAGGGTCATCATCTCCGTCGGTT   |
| <b>For detection of FoxO1 binding</b>               | <b>Sequence (5'-3')</b>    |



|                                                |                           |
|------------------------------------------------|---------------------------|
| <i>Foxp3</i> CNS1-F                            | CCCTGCAATTATCAGCACAC      |
| <i>Foxp3</i> CNS1-R                            | TGTGGGAAACTGCCACATTA      |
| <i>Foxp3</i> CNS2-F                            | GGTGGGAAAGTGGGCTATCT      |
| <i>Foxp3</i> CNS2-R                            | ATGCACAGAGGGAATGGAAT      |
| <i>Foxp3</i> CNS3-F                            | ATCTGGCCAAGTTCAGGTTG      |
| <i>Foxp3</i> CNS3-R                            | GGCGTTCCTGTTTGACTGTT      |
| <b>For detection of c-<br/>Rel/p65 binding</b> | <b>Sequence (5'-3')</b>   |
| Promoter NFkB-F                                | CCCTCTAGCAGTCCACTTCACCAA  |
| Promoter NFkB-R                                | AATACCTCTCTGCCACTTTCGCCA  |
| CNS3 NFkB-1-F                                  | TTTGCATGGTAGCCAGATGGACG   |
| CNS3 NFkB-1-R                                  | AGGTTTCGTTCCGAGAAGTGGCTA  |
| CNS3 NFkB-2-F                                  | TTTGCATGGTAGCCAGATGGACG   |
| CNS3 NFkB-2-R                                  | AGGTTTCGTTCCGAGAAGTGGCTA  |
| CNS3 NFkB-3-F                                  | TCCCAGAAACAACCTCCATACAGC  |
| CNS3 NFkB-3-R                                  | TGTCTAGTGGTACTAGGGACCTGGA |
